# Supplementary material for: Pressurized natural deep eutectic solvents: An alternative approach to agro-soy by-products
Source: PubMed Central journal article supplement (PMC9493435; doi:10.3389/fnut.2022.953169), 2022-09-08
Supplement: Data_Sheet_1.pdf [file Data_Sheet_1.pdf]

*Supplementary Material*

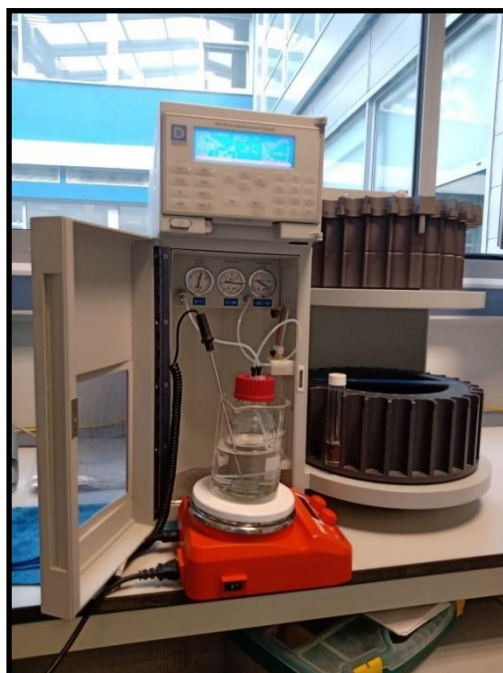

**Figure S1.** Equipment used to perform the pressurized Natural Hydrophobic Eutectic Solvents (NaHDES) extraction (ASE 200 device - Dionex, USA), with the bottle of respective solvents maintained at 90 °C.

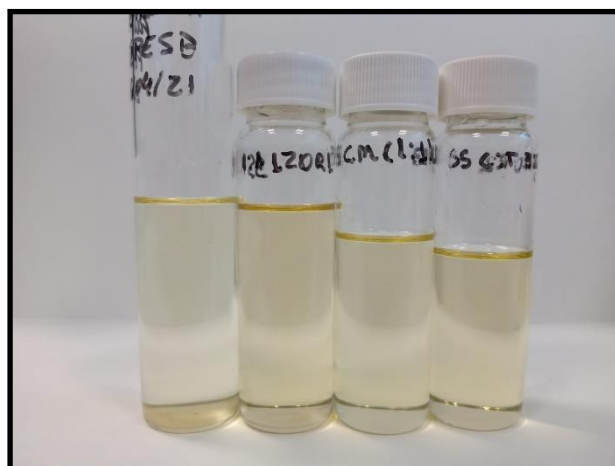

**Figure S2.** Pressurized *n*-heptane and Natural Hydrophobic Eutectic Solvents (NaHDES) extracts of soybean at 120 °C. As follows: *n*-heptane, eucalyptol:menthol (1:1), camphor:menthol (1:1), camphor:thymol (3:2) extracts.

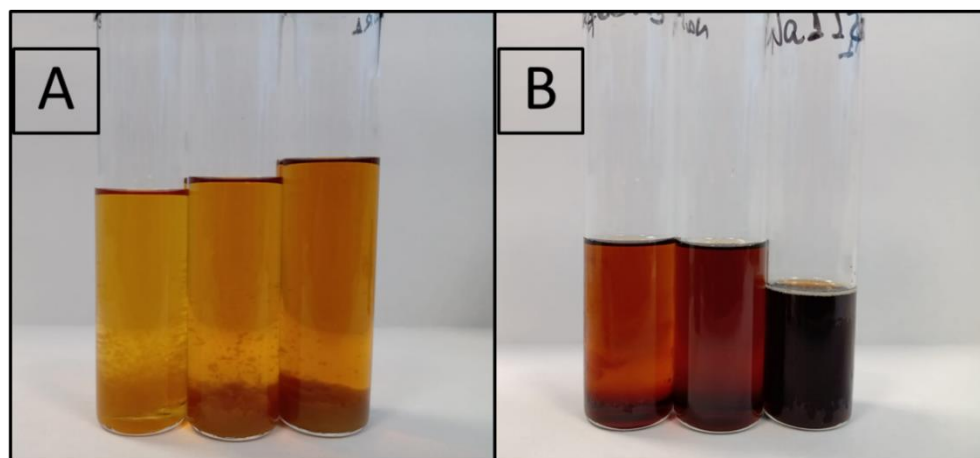

**Figure S3.** Pressurized EtOH-H<sub>2</sub>O 7:3 (v/v) (A) and Natural Eutectic Solvents (NADES) (B) extracts of the mix of soy parts, i.e., branches, leaves, pods, and roots, at 60, 90, and 120 °C, respectively.

**Table S1.** Natural Hydrophobic Eutectic Solvents (NaHDES) (1–18) with their respective Hansen Solubility Parameters (HSP) and distance (Ra) compared to *n*-heptane. A lower Ra value represents a higher similarity between the NaHDES and *n*-heptane.

| <b>Nahdes (molar ratio)</b>     | <b>Dtotal</b> | <b>Ptotal</b> | <b>Htotal</b> | <b>Ra</b>   | <b>Ref</b>   |
|---------------------------------|---------------|---------------|---------------|-------------|--------------|
| <i>Heptane</i>                  | 15.30         | 0.00          | 0.00          | 0.00        |              |
| <b>Menthol:Eucalyptol(1:1)*</b> | <b>16.59</b>  | <b>3.17</b>   | <b>4.82</b>   | <b>6.33</b> | <b>18</b>    |
| Borneol:Oleic acid(1:4)         | 16.46         | 3.08          | 5.71          | 6.88        | 15           |
| Borneol:Oleic acid(1:3)         | 16.47         | 3.10          | 5.76          | 6.95        | 15           |
| Borneol:Oleic acid(1:2)         | 16.50         | 3.14          | 5.87          | 7.08        | 15           |
| <b>Camphor:Menthol(1:1)*</b>    | <b>16.91</b>  | <b>4.28</b>   | <b>4.71</b>   | <b>7.13</b> | <b>10,18</b> |
| Menthol:Camphor(2:1)            | 16.77         | 4.00          | 5.48          | 7.39        | 5,10         |
| Camphor:Thymol(2:1)             | 17.53         | 4.80          | 3.81          | 7.58        | 10,13        |
| <b>Camphor:Thymol(3:2)*</b>     | <b>17.56</b>  | <b>4.72</b>   | <b>4.16</b>   | <b>7.74</b> | <b>13</b>    |
| Camphor:Thymol(1:1)             | 17.60         | 4.60          | 4.67          | 8.01        | 4,5,10,13    |
| Menthol:Myristic acid(8:1)      | 16.47         | 3.47          | 6.86          | 8.03        | 18           |
| Menthol:Dodecanoic acid(2:1)    | 16.42         | 3.69          | 7.13          | 8.33        | 3,7,11       |
| Perillyl alcohol:Camphor(1:1)   | 17.35         | 4.74          | 5.70          | 8.47        | 18           |
| Camphor:Thymol(1:2)             | 17.67         | 4.40          | 5.51          | 8.49        | 10,13        |
| Thymol:Menthol(1:2)             | 16.89         | 3.65          | 6.99          | 8.50        | 1,10,17      |
| 1-Tetradecanol:Menthol(1:2)     | 16.34         | 3.38          | 7.68          | 8.64        | 1            |
| Decanoic acid:Menthol(1:2)      | 16.43         | 3.74          | 7.48          | 8.66        | 1,5          |
| Thymol:Menthol(1:1)             | 17.10         | 3.73          | 7.04          | 8.74        | 1,5,8,10,17  |
| Menthol:Decanoic acid(3:2)      | 16.42         | 3.79          | 7.59          | 8.77        | 5,8          |
| Nonanoic acid:Menthol(1:1,5)    | 16.42         | 3.85          | 7.75          | 8.94        | 8            |
| Decanoic acid:Menthol(1:1)      | 16.40         | 3.86          | 7.76          | 8.94        | 1,5,7,9,11   |
| Menthol:Thymol(1:2)             | 17.32         | 3.82          | 7.09          | 9.01        | 10,17        |
| Borneol:Thymol(1:1)             | 17.34         | 3.85          | 7.25          | 9.17        | 15           |
| Menthol:Lidocaine(2:1)          | 17.04         | 5.31          | 6.63          | 9.18        | 1            |

|                                    |       |      |      |       |         |
|------------------------------------|-------|------|------|-------|---------|
| Borneol:Thymol(1:2)                | 17.49 | 3.90 | 7.23 | 9.31  | 15      |
| Decanoic acid:Palmitic acid(8:1)   | 16.28 | 4.06 | 8.15 | 9.32  | 7       |
| Decanoic acid:Myristic acid(5:1)   | 16.30 | 4.01 | 8.18 | 9.32  | 7       |
| Octanoic acid:Menthol(1:1,5)       | 16.43 | 4.12 | 8.06 | 9.33  | 8       |
| Decanoic acid:dodecanoic acid(2:1) | 16.30 | 4.13 | 8.19 | 9.39  | 2,4,9   |
| Borneol:thymol(1:3)                | 17.57 | 3.92 | 7.23 | 9.39  | 15      |
| Menthol:Perillyl alcohol(1:1)      | 16.87 | 3.87 | 7.97 | 9.40  | 18      |
| Dodecanoic acid:lidocaine(2:1)     | 16.84 | 5.43 | 7.06 | 9.42  | 1       |
| Borneol:thymol(1:4)                | 17.62 | 3.94 | 7.22 | 9.44  | 15      |
| Dodecanoic acid:Atropine(2:1)      | 17.06 | 4.14 | 7.72 | 9.44  | 1       |
| Borneol:Decanoic acid(1:2)         | 16.48 | 4.05 | 8.21 | 9.45  | 15      |
| Decanoic acid:Dodecanoic acid(3:1) | 16.30 | 4.14 | 8.29 | 9.48  | 7       |
| C9:C10:C12 (1:1:1)                 | 16.30 | 4.18 | 8.33 | 9.53  | 2       |
| Borneol:Decanoic acid(1:3)         | 16.43 | 4.09 | 8.31 | 9.54  | 15      |
| Decanoic acid:Thymol(1:1)          | 16.98 | 4.11 | 7.97 | 9.57  | 4,5,8,9 |
| Borneol:Decanoic acid(1:4)         | 16.41 | 4.11 | 8.37 | 9.59  | 15      |
| C9:C10:C12 (1:2:1)                 | 16.30 | 4.19 | 8.40 | 9.59  | 2       |
| Menthol:Butyric acid(1:1)          | 16.20 | 4.03 | 8.53 | 9.60  | 11      |
| Menthol:Acetic acid(1:1)           | 16.19 | 4.23 | 8.48 | 9.64  | 3,11,16 |
| Menthol:Octanoic acid(1:1)         | 16.41 | 4.28 | 8.38 | 9.67  | 9,11    |
| C9:C10:C12 (2:1:1)                 | 16.30 | 4.23 | 8.51 | 9.71  | 2       |
| C9:C10:C12 (2:2:1)                 | 16.30 | 4.23 | 8.53 | 9.72  | 2       |
| C9:C10:C12 (3:2:1)                 | 16.30 | 4.25 | 8.61 | 9.81  | 2       |
| C9:C10:C12 (3:1:1)                 | 16.30 | 4.26 | 8.62 | 9.82  | 2       |
| Nonanoic acid:Dodecanoic acid(3:1) | 16.30 | 4.28 | 8.62 | 9.83  | 2       |
| Nonanoic acid:Thymol(1:1)          | 17.01 | 4.21 | 8.20 | 9.83  | 8       |
| C8:C10:C12 (1:1:1)                 | 16.30 | 4.40 | 8.58 | 9.85  | 2       |
| C8:C9:C12 (1:1:1)                  | 16.30 | 4.47 | 8.74 | 10.02 | 2       |

|                                    |       |      |       |       |        |
|------------------------------------|-------|------|-------|-------|--------|
| C8:C9:C12 (1:2:1)                  | 16.30 | 4.45 | 8.83  | 10.09 | 2      |
| Decanoic acid:Lidocaine(2:1)       | 16.90 | 5.71 | 7.70  | 10.10 | 1      |
| 1-Naphthol:Menthol(1:2)            | 17.31 | 4.21 | 8.27  | 10.11 | 1      |
| Decanoic acid:Atropine(2:1)        | 17.14 | 4.28 | 8.40  | 10.12 | 1      |
| Menthol:Anisyl alcohol(2:1)        | 17.18 | 4.60 | 8.28  | 10.19 | 12     |
| C8:C10:C12 (2:1:1)                 | 16.30 | 4.57 | 8.91  | 10.21 | 2      |
| Thymol:Lidocaine(2:1)              | 17.84 | 5.78 | 6.78  | 10.25 | 1      |
| Atropine:Thymol(1:2)               | 18.07 | 4.18 | 7.60  | 10.29 | 1      |
| Menthol:Hexanoic acid(1:1)         | 16.42 | 4.43 | 9.04  | 10.32 | 11     |
| C8:C10:C12 (3:2:1)                 | 16.30 | 4.60 | 9.03  | 10.33 | 2      |
| C8:C9:C12 (2:1:1)                  | 16.30 | 4.63 | 9.04  | 10.35 | 2      |
| Thymol:Octanoic acid(1:1)          | 17.05 | 4.60 | 8.65  | 10.41 | 9      |
| C8:C10:C12 (3:1:1)                 | 16.30 | 4.68 | 9.12  | 10.45 | 2      |
| C8:C9:C12 (3:2:1)                  | 16.30 | 4.68 | 9.21  | 10.52 | 2      |
| Decanol:Thymol(1,5:1)              | 16.71 | 3.94 | 9.39  | 10.56 | 8      |
| Octanoic acid:Thymol(29:21)        | 16.93 | 4.70 | 8.89  | 10.57 | 8      |
| C8:C9:C12 (3:1:1)                  | 16.30 | 4.73 | 9.23  | 10.57 | 2      |
| Thymol:Lidocaine(1:1)              | 17.86 | 6.50 | 6.61  | 10.58 | 1      |
| Thymol:Coumarin(2:1)               | 18.22 | 5.81 | 6.73  | 10.63 | 1,10   |
| Octanoic acid:Dodecanoic acid(3:1) | 16.30 | 4.82 | 9.27  | 10.63 | 2,9    |
| Dodecanoic acid:Butyric acid(1:3)  | 15.91 | 4.61 | 9.87  | 10.96 | 4      |
| Thymol:Coumarin(1:1)               | 18.45 | 6.83 | 6.46  | 11.32 | 1,5,10 |
| Menthol:Anisyl alcohol(1:1)        | 17.58 | 5.26 | 9.10  | 11.46 | 12     |
| Menthol:Levulinic acid(1:1)        | 16.79 | 5.99 | 9.39  | 11.53 | 11     |
| Octanol:Thymol(2:1)                | 16.67 | 4.27 | 10.60 | 11.75 | 8      |
| 1,2-Decanediol:Thymol(1:2)         | 17.27 | 4.53 | 10.14 | 11.78 | 1      |
| Dodecanoic acid:Hexanoic acid(1:3) | 16.30 | 5.13 | 10.45 | 11.81 | 4      |
| Coumarin:Thymol(2:1)               | 18.71 | 7.94 | 6.17  | 12.15 | 10     |
| Menthol:Anisyl alcohol(1:2)        | 18.04 | 6.02 | 10.05 | 12.93 | 12     |

|                              |       |       |       |       |      |
|------------------------------|-------|-------|-------|-------|------|
| Menthol:Lactic acid(1:1)     | 16.78 | 5.66  | 11.30 | 12.98 | 5    |
| Imidazole:Acetic acid(1:2)   | 16.85 | 8.77  | 13.01 | 13.12 | 14   |
| Imidazole:Octanoic acid(1:2) | 16.89 | 6.46  | 10.43 | 13.16 | 14   |
| Imidazole:Butyric acid(1:2)  | 16.69 | 7.06  | 11.85 | 13.32 | 14   |
| Menthol:Acetic acid(1:2)     | 16.00 | 4.68  | 9.46  | 13.51 | 14   |
| Pyrazole:Octanoic acid(1:2)  | 16.97 | 6.10  | 10.50 | 13.54 | 14   |
| Menthol:Octanoic acid(1:2)   | 16.37 | 4.57  | 8.92  | 13.64 | 14   |
| Pyrazole:Decanoic acid(1:2)  | 16.88 | 5.12  | 9.16  | 13.66 | 14   |
| Imidazole:Hexanoic acid(1:2) | 17.01 | 7.20  | 12.16 | 13.69 | 14   |
| Menthol:Butyric acid(1:2)    | 16.05 | 4.30  | 9.34  | 13.83 | 14   |
| Pyrazole:Acetic acid(1:2)    | 17.04 | 7.99  | 13.16 | 13.83 | 14   |
| Menthol:Hexanoic acid(1:2)   | 16.38 | 4.82  | 9.95  | 13.85 | 14   |
| Pyrazole:Butyric acid(1:2)   | 16.82 | 6.51  | 11.96 | 13.89 | 14   |
| Menthol:Pyrazole(3:1)        | 16.89 | 4.24  | 7.49  | 13.89 | 14   |
| Benzyl alcohol:Thymol(4:1)   | 18.67 | 5.45  | 11.03 | 14.03 | 8    |
| Pyrazole:Hexanoic acid(1:2)  | 17.11 | 6.76  | 12.24 | 14.12 | 14   |
| Menthol:Pyruvic acid(1:2)    | 17.07 | 7.71  | 11.33 | 14.15 | 3,11 |
| Thymol:Lactic acid(1:1)      | 17.70 | 6.25  | 12.02 | 14.38 | 5    |
| Menthol:lactic acid(1:2)     | 16.94 | 6.86  | 13.75 | 15.72 | 3    |
| Leucine:Lactic acid(1:3)     | 17.01 | 8.58  | 18.76 | 20.91 | 6    |
| Arginine:Lactic acid(1:3)    | 17.23 | 10.51 | 18.37 | 21.52 | 6    |
| Leucine:Lactic acid(1:4)     | 17.10 | 9.02  | 19.38 | 21.68 | 6    |
| Arginine:Lactic acid(1:4)    | 17.27 | 10.61 | 19.05 | 22.16 | 6    |
| Leucine:Lactic acid(1:5)     | 17.16 | 9.32  | 19.83 | 22.22 | 6    |
| Arginine:Lactic acid(1:5)    | 17.31 | 10.68 | 19.54 | 22.62 | 6    |
| Serine:Lactic acid(1:5)      | 17.54 | 11.21 | 22.74 | 25.74 | 6    |
| Serine:Lactic acid(1:4)      | 17.54 | 11.23 | 22.80 | 25.81 | 6    |
| Serine:Lactic acid(1:3)      | 17.55 | 11.26 | 22.90 | 25.91 | 6    |

---

\*NaHDES selected to defat soybeans using PLE

## REFERENCES

1. van Osch DJGPGP, Dietz CHJTJT, van Spronsen J, Kroon MC, Gallucci F, van Sint Annaland M, et al. A Search for Natural Hydrophobic Deep Eutectic Solvents Based on Natural Components. *ACS Sustainable Chemistry and Engineering* [Internet]. 2019 Mar 4 [cited 2021 Nov 24];7(3):2933–42. Available from: <https://pubs.acs.org/sharingguidelines>
2. Florindo C, Romero L, Rintoul I, Branco LC, Marrucho IM. From Phase Change Materials to Green Solvents: Hydrophobic Low Viscous Fatty Acid-Based Deep Eutectic Solvents. *ACS Sustainable Chemistry and Engineering* [Internet]. 2018 Feb 4;6(3):3888–95. Available from: <https://doi.org/10.1021/acssuschemeng.7b04235>
3. Ribeiro BD, Florindo C, Iff LC, Coelho MAZ, Marrucho IM. Menthol-based eutectic mixtures: Hydrophobic low viscosity solvents. *ACS Sustainable Chemistry and Engineering* [Internet]. 2015 Mar 4;3(10):2469–77. Available from: <https://doi.org/10.1021/acssuschemeng.5b00532>
4. Morelli DC, Bernardi G, Morés L, Pierri ME, Carasek E. A green - high throughput – extraction method based on hydrophobic natural deep eutectic solvent for the determination of emerging contaminants in water by high performance liquid chromatography – diode array detection. *Journal of Chromatography A* [Internet]. 2020 Mar 4;1626:461377. Available from: <https://www.sciencedirect.com/science/article/pii/S0021967320306543>
5. Ye X, Ye B, Xu J, Fang M, Dong D, Wu C, et al. A modified quick, easy, cheap, effective, rugged, and safe method with hydrophobic natural deep eutectic solvent as extractant and analyte protectant for analyzing pyrethroid residues in tomatoes. *Journal of Separation Science* [Internet]. 2020 Mar 4;43(17):3546–54. Available from: <https://onlinelibrary.wiley.com/doi/abs/10.1002/jssc.202000547>
6. Nia NN, Hadjmohammadi MR. Amino acids- based hydrophobic natural deep eutectic solvents as a green acceptor phase in two-phase hollow fiber-liquid microextraction for the determination of caffeic acid in coffee, green tea, and tomato samples. *Microchemical Journal* [Internet]. 2021 Mar 4;164:106021. Available from: <https://www.sciencedirect.com/science/article/pii/S0026265X21001065>
7. Haider MB, Dwivedi M, Jha D, Kumar R, Marriyappan Sivagnanam B. Azeotropic separation of isopropanol-water using natural hydrophobic deep eutectic solvents. *Journal of Environmental Chemical Engineering* [Internet]. 2021 Feb 28;9(1):104786. Available from: <https://www.sciencedirect.com/science/article/pii/S2213343720311350>
8. Sereshti H, Semnani Jazani S, Nouri N, Shams G. Dispersive liquid–liquid microextraction based on hydrophobic deep eutectic solvents: Application for tetracyclines monitoring in milk. *Microchemical Journal* [Internet]. 2020 Mar 5;158:105269. Available from: <https://www.sciencedirect.com/science/article/pii/S0026265X20316568>
9. Sas OG, Castro M, Domínguez Á, González B. Removing phenolic pollutants using Deep Eutectic Solvents. *Separation and Purification Technology* [Internet]. 2019 Mar 5;227:115703. Available from: <https://www.sciencedirect.com/science/article/pii/S1383586619317988>

10. Hansen FA, Santigosa-Murillo E, Ramos-Payán M, Muñoz M, Leere Øiestad E, Pedersen-Bjergaard S. Electromembrane extraction using deep eutectic solvents as the liquid membrane. *Analytica Chimica Acta* [Internet]. 2021 Mar 4;1143:109–16. Available from: <https://www.sciencedirect.com/science/article/pii/S0003267020311740>
11. Florindo C, Branco LC, Marrucho IM. Development of hydrophobic deep eutectic solvents for extraction of pesticides from aqueous environments. *Fluid Phase Equilibria* [Internet]. 2017 Mar 4;448:135–42. Available from: <https://www.sciencedirect.com/science/article/pii/S0378381217301425>
12. Fan Y, Wu H, Cai D, Yang T, Yang L. Effective extraction of harmine by menthol/anise alcohol-based natural deep eutectic solvents. *Separation and Purification Technology* [Internet]. 2020 Mar 4;250:117211. Available from: <https://www.sciencedirect.com/science/article/pii/S1383586620316853>
13. Li Y, Li X, Tang S, Yang Y. Emulsification liquid–liquid micro-extraction based on natural deep eutectic solvent for (triarylmethane) dyes determination. *Chemical Papers* [Internet]. 2020 Mar 4;74(10):3617–26. Available from: <https://doi.org/10.1007/s11696-020-01184-4>
14. Lo C, Semerel J, van den Berg C, Wijffels RH, Eppink MHM. Eutectic solvents with tuneable hydrophobicity: lipid dissolution and recovery. *RSC Advances* [Internet]. 2021 Feb 25;11(14):8142–9. Available from: <https://pubs.rsc.org/en/content/articlelanding/2021/ra/d1ra00306b>
15. Majidi SM, Hadjmohammadi MR. Hydrophobic borneol-based natural deep eutectic solvents as a green extraction media for air-assisted liquid-liquid micro-extraction of warfarin in biological samples. *Journal of Chromatography A* [Internet]. 2020 Mar 4;1621:461030. Available from: <https://www.sciencedirect.com/science/article/pii/S0021967320302466>
16. Ortega-Zamora C, González-Sálamo J, González-Sálamo J, Hernández-Sánchez C, Hernández-Sánchez C, Hernández-Borges J, et al. Menthol-Based Deep Eutectic Solvent Dispersive Liquid-Liquid Microextraction: A Simple and Quick Approach for the Analysis of Phthalic Acid Esters from Water and Beverage Samples. *ACS Sustainable Chemistry and Engineering* [Internet]. 2020 Mar 4;8(23):8783–94. Available from: <https://doi.org/10.1021/acssuschemeng.0c02603>
17. Santana-Mayor Á, Socas-Rodríguez B, Rodríguez-Ramos R, Herrera-Herrera A v., Rodríguez-Delgado MÁ. Quality assessment of environmental water by a simple and fast non-ionic hydrophobic natural deep eutectic solvent-based extraction procedure combined with liquid chromatography tandem mass spectrometry for the determination of plastic migrants. *Analytical and Bioanalytical Chemistry* [Internet]. 2021 Mar 4;413(7):1967–81. Available from: <https://doi.org/10.1007/s00216-021-03166-1>
18. Rodrigues LA, Pereira C v., Leonardo IC, Fernández N, Gaspar FB, Silva JM, et al. Terpene-Based Natural Deep Eutectic Systems as Efficient Solvents to Recover Astaxanthin from Brown Crab Shell Residues. *ACS Sustainable Chemistry and Engineering* [Internet]. 2020 Mar 4;8(5):2246–59. Available from: <https://doi.org/10.1021/acssuschemeng.9b06283>
